# Supplementary material
Source: PubMed Central journal article supplement (PMC8500932)

Supplementary figure 1

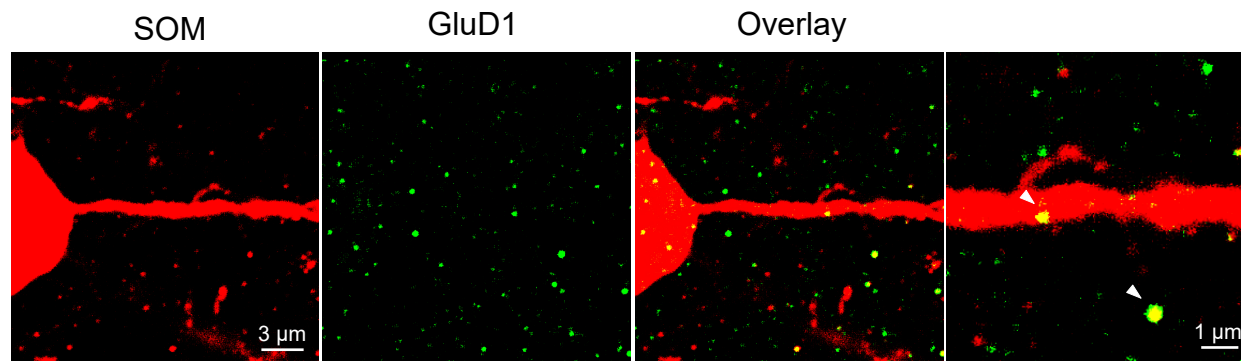

Supplement: NIHMS1719366-supplement-1719366_Sup_Fig1.pdf [file NIHMS1719366-supplement-1719366_Sup_Fig1.pdf]

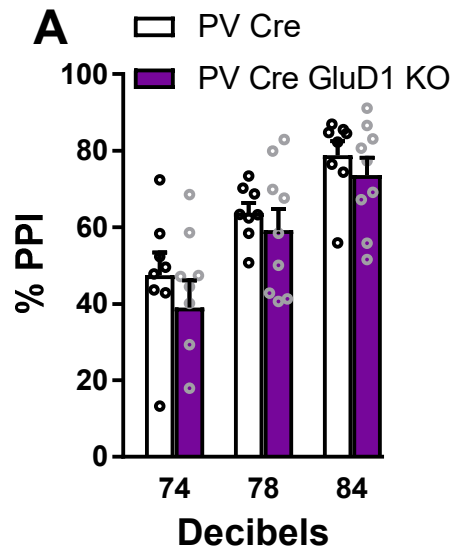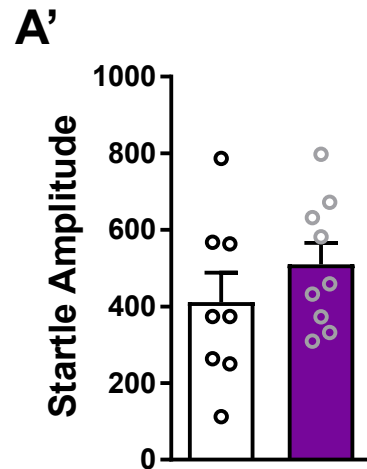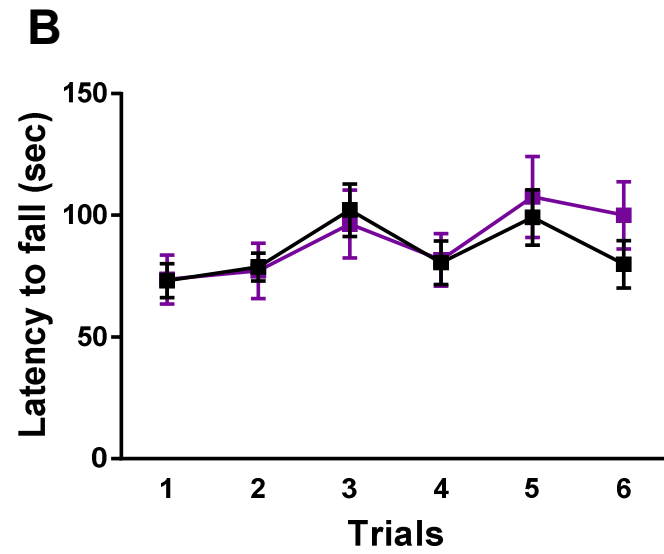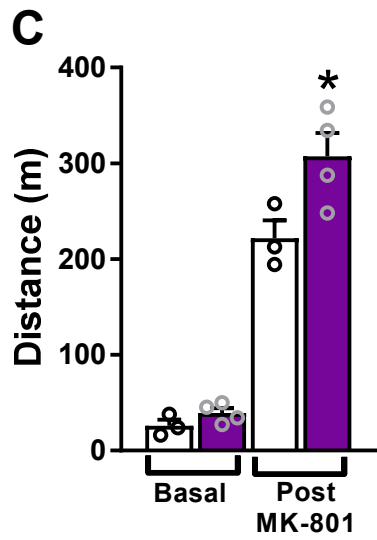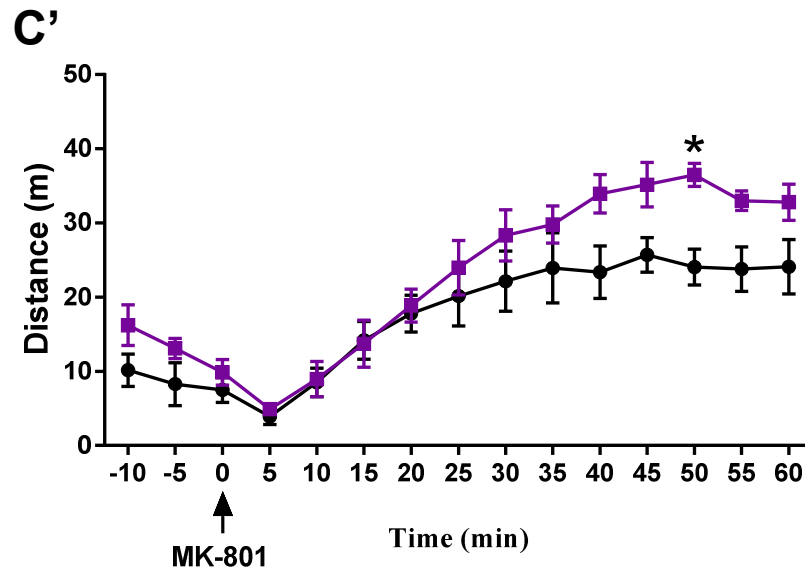

Supplement: NIHMS1719366-supplement-1719366_Sup_Fig2.pdf [file NIHMS1719366-supplement-1719366_Sup_Fig2.pdf]
